# Supplementary material for: Genomic Analysis of Individual Differences in Ethanol Drinking: Evidence for Non-Genetic Factors in C57BL/6 Mice
Source: PLoS One. 2011 Jun 16;6(6):e21100. doi: 10.1371/journal.pone.0021100 (PMC3116881; doi:10.1371/journal.pone.0021100)
Supplement: Table S1 — Average Ethanol Intake and Preference for six C57BL/6NCrl litters. Average ethanol intake and preference for six separate litters of male mice (n = 4−5/litter) was calculated over 14 days of 24 h access to 2-bottle choice ethanol. There was no significant difference in intake or preference as reported in Results. (XLSX) [file pone.0021100.s004.xlsx]

## Sheet: Sheet1
Wolstenholme et al: Supplemental Table S1: Average Ethanol Intake and Preference for six C57BL/6 litters
Litter	Ethanol Intake (g/kg)	Ethanol Preference
A	6.73 +/- 0.49	0.45 +/- 0.04
B	7.03 +/- 0.63	0.52 +/- 0.04
C	6.43 +/- 0.56	0.33 +/- 0.04
D	6.99 +/- 0.49	0.49 +/- 0.03
E	6.26 +/- 0.52	0.50 +/- 0.04
F	8.33 +/- 0.49	0.66 +/- 0.04
