# Supplementary material for: Genomic Analysis of Individual Differences in Ethanol Drinking: Evidence for Non-Genetic Factors in C57BL/6 Mice
Source: PLoS One. 2011 Jun 16;6(6):e21100. doi: 10.1371/journal.pone.0021100 (PMC3116881; doi:10.1371/journal.pone.0021100)
Supplement: Table S4 — Over-Represented Gene Categories From Gene Expression Significantly Correlated To Average Ethanol Drinking. Gene data from Table S2 was analyzed by functional over-representation analysis versus Gene Ontology categories. Categories in bold were also significant in the Bibliosphere analysis. (XLSX) [file pone.0021100.s007.xlsx]

## Sheet: Sheet1
Wolstenholme et al: Supplementary Table S4: Over-represented gene categories significantly correlated to ethanol drinking in C57BL/6NCrl mice. Categories in bold were also significant in the Bibliosphere analysis.
Annotation Groups	Gene Category	List % (n)	Chip % (n)	p value
	Nucleus Accumbens (n=965)
SwissProt keyword	TPR Repeat	2.4 (8)	0.5 (22)	0.00063
GO Molecular Function	Sulfurtransferase Activity	0.6 (4)	0.04 (4)	0.0013
GO Cellular Component	Clathrin-Coated Vesicle	2.2 (15)	0.9 (84)	0.0023
SwissProt keyword	Inner Membrane	2.7 (9)	0.7 (34)	0.0023
GO Biological Process	Protein Targeting	3.4 (23)	1.7 (165)	0.0028
PFAM domain	FERM Domain	1.5 (6)	0.3 (17)	0.0041
GO Molecular Function	Adenylate Kinase Activity	0.6 (4)	0.1 (6)	0.0059
GO Cellular Component	Synaptic Vesicle	1.5 (10)	0.5 (48)	0.0062
GO Biological Process	Small GTPase Mediated Signal Transduction	3.9 (26)	2.2 (209)	0.0063
GO Cellular Component	Microtubule Cytoskeleton	3.6 (25)	2.1 (198)	0.0073
GO Cellular Component	Mitochondrial Envelope	4.2 (29)	2.5 (242)	0.0075
GenMAPP pathway	G13 Signaling Pathway	10.5 (8)	3.3 (33)	0.0084
KEGG_Pathway	Keratan Sulfate Biosynthesis	2.1 (5)	0.4 (13)	0.011
GO Biological Process	Ceramide Metabolism	0.9 (6)	0.2 (20)	0.011
SwissProt keyword	RNA-Binding	4.2 (14)	1.9 (90)	0.012
PFAM domain	14-3-3 Protein	1 (4)	0.1 (8)	0.013
SwissProt keyword	Protein Transport	4.5 (15)	2.2 (102)	0.014
SMART domain	RNA Recognition Motif	6.9 (16)	3.6 (127)	0.017
SwissProt keyword	Kinase	3.3 (11)	1.4 (65)	0.017
PIR keyword	Extracellular Matrix	6 (7)	1.9 (30)	0.017
GO Cellular Component	Basement Membrane	1.2 (8)	0.4 (39)	0.019
PIR keyword	Nucleotide Binding	10.3 (12)	4.8 (78)	0.02
GO Molecular Function	Sodium:Potassium-Exchanging ATPase Activity	0.6 (4)	0.1 (9)	0.021
KEGG_Pathway	Galactose Metabolism	3 (7)	1 (32)	0.024
GO Biological Process	Rho Protein Signal Transduction	0.9 (6)	0.3 (24)	0.024
GO Biological Process	Establishment and/or Maintenance of Chromatin Architecture	2.8 (19)	1.6 (155)	0.024
PFAM domain	Fringe-Like	0.7 (3)	0.1 (4)	0.025
PFAM domain	Uncharacterized Protein Family UPF0005	0.7 (3)	0.1 (4)	0.025
GO Molecular Function	Protein Domain Specific Binding	1.1 (8)	0.4 (42)	0.025
PIR keyword	Collagen Binding	2.6 (3)	0.2 (4)	0.028
GO Biological Process	Axon Cargo Transport	0.6 (4)	0.1 (10)	0.029
GO Cellular Component	Histone Deacetylase Complex	0.7 (5)	0.2 (17)	0.029
GO Biological Process	Cell Division	2.8 (19)	1.7 (158)	0.029
SwissProt keyword	Glycolysis	1.8 (6)	0.5 (25)	0.03
GO Cellular Component	Ribosome	2.8 (19)	1.6 (157)	0.031
GO Molecular Function	Translation Factor Activity, Nucleic Acid Binding	1.8 (13)	0.9 (95)	0.033
GO Biological Process	Dendrite Morphogenesis	0.7 (5)	0.2 (18)	0.034
GO Molecular Function	Primary Active Transporter Activity	2.5 (18)	1.5 (151)	0.035
GO Biological Process	Regulation of Kinase Activity	1.8 (12)	0.9 (85)	0.036
GO Biological Process	Cellular Macromolecule Catabolism	3.6 (24)	2.3 (220)	0.037
GO Cellular Component	Microtubule	2.3 (16)	1.3 (127)	0.037
GO Biological Process	Nitric Oxide Metabolism	0.6 (4)	0.1 (11)	0.038
GO Molecular Function	Ubiquitin-Protein Ligase Activity	2.6 (19)	1.6 (164)	0.039
PIR keyword	Ligase	3.4 (4)	0.7 (11)	0.039
GO Molecular Function	Phospholipid Binding	1.5 (11)	0.7 (76)	0.039
PFAM domain	Phosphatidylinositol Transfer Protein	0.7 (3)	0.1 (5)	0.039
KEGG pathway	Translation	16 (12)	8.5 (79)	0.04
PIR keyword	Tandem Repeat	4.3 (5)	1.2 (19)	0.042
GO Biological Process	Hydrogen Ion Homeostasis	0.4 (3)	0.1 (5)	0.043
GO Cellular Component	Eukaryotic Translation Elongation Factor 1 Complex	0.4 (3)	0.1 (5)	0.044
GO Molecular Function	Unfolded Protein Binding	1.9 (14)	1.1 (111)	0.047
GO Molecular Function	Tubulin Binding	1.1 (8)	0.5 (48)	0.048
	Prefrontal Cortex (n=926)
GO Cellular Component	Mitochondrial Inner Membrane	4.5 (28)	2.2 (209)	0.00044
SMART domain	Thrombospondin Type 1 Repeats	2.7 (6)	0.5 (19)	0.0051
SwissProt keyword	Neurogenesis	2.7 (8)	0.8 (35)	0.0061
GO Biological Process	DNA Replication	2.4 (15)	1.1 (104)	0.0073
GO Biological Process	Glycerophospholipid Metabolism	1.1 (7)	0.3 (28)	0.0082
SMART domain	Src Homology 3 Domains	6.8 (15)	3.1 (111)	0.0083
GO Molecular Function	Oxidoreductase Activity, Acting on NADH or NADPH	1.5 (10)	0.5 (54)	0.0087
GO Molecular Function	Structural Constituent of Ribosome	2.9 (20)	1.6 (164)	0.013
GO Molecular Function	Magnesium Ion Binding	3.6 (25)	2.2 (225)	0.015
SwissProt keyword	Ligase	2.7 (8)	0.9 (42)	0.017
GO Biological Process	Cell Projection Organization and Biogenesis	1.1 (7)	0.3 (33)	0.018
PFAM domain	GDNF Receptor Family	0.8 (3)	0.1 (4)	0.022
GO Biological Process	Antigen Presentation	1.3 (8)	0.5 (44)	0.022
PFAM domain	Mitochondrial Carrier Protein	1.8 (7)	0.6 (36)	0.023
GO Molecular Function	Ligase Activity, Forming Phosphoric Ester Bonds	0.4 (3)	0.04 (4)	0.024
GO Molecular Function	Metal Ion Transporter Activity	1.5 (10)	0.6 (65)	0.028
GO Molecular Function	Protein Transporter Activity	2 (14)	1.1 (109)	0.029
SwissProt keyword	Serine/Threonine-Protein Kinase	5.4 (16)	3 (137)	0.03
KEGG_Pathway	Axon Guidance	6.4 (14)	3.4 (113)	0.032
SwissProt keyword	Zymogen	4.7 (14)	2.5 (115)	0.033
GO Cellular Component	Mitochondrial Ribosome	1.1 (7)	0.4 (39)	0.038
GO Biological Process	mRNA Metabolism	3.1 (19)	1.9 (177)	0.04
GO Molecular Function	Phosphoinositide Binding	0.9 (6)	0.3 (29)	0.041
GO Cellular Component	Lysosome	2.1 (13)	1.1 (106)	0.041
GO Molecular Function	Primary Active Transporter Activity	2.5 (17)	1.5 (151)	0.044
GO Biological Process	Female Gamete Generation	0.8 (5)	0.2 (21)	0.044
GO Biological Process	Regulation Of Cell Shape	1.1 (7)	0.4 (41)	0.048
SMART domain	Domain in RING Finger and WD Repeat	1.4 (3)	0.2 (6)	0.049
PFAM domain	Endonuclease/Exonuclease/Phosphatase Family	0.8 (3)	0.1 (6)	0.05
PFAM domain	ATP P2X Receptor	0.8 (3)	0.1 (6)	0.05
PFAM domain	Nucleotide-Sugar Transporter	0.8 (3)	0.1 (6)	0.05
	Ventral Midbrain Region (n=716)
SMART domain	Band 4.1 Homologues	10.3 (3)	0.5 (3)	0.0069
GO Biological Process	Locomotory Behavior	3 (15)	1.4 (131)	0.0093
PIR keyword	Cell Adhesion	6.1 (5)	1.2 (20)	0.015
KEGG pathway	Porphyrin And Chlorophyll Metabolism	9.3 (4)	1.4 (14)	0.017
KEGG_Pathway	Pentose and Glucuronate Interconversions	2.3 (4)	0.4 (12)	0.021
KEGG_Pathway	Toll-Like Receptor Signaling Pathway	5.8 (10)	2.5 (82)	0.024
GO Cellular Component	Cell Projection	3.4 (17)	1.8 (178)	0.025
KEGG pathway	Glycosaminoglycandegradation	7 (3)	0.7 (7)	0.03
PIR keyword	Myristylation	6.1 (5)	1.5 (25)	0.033
SwissProt keyword	Lysosome	2.9 (7)	1 (48)	0.036
PIR superfamily	ADP-Ribosylation Factor	2.9 (3)	0.3 (7)	0.045
GO Molecular Function	Lyase Activity	2.4 (13)	1.3 (133)	0.046
GO Biological Process	Regulation of Anti-Apoptosis	0.6 (3)	0.1 (7)	0.049
GO Cellular Component	Basolateral Plasma Membrane	1.4 (7)	0.5 (51)	0.05
